# Supplementary material for: Patient–Proxy Agreement Regarding Health-Related Quality of Life in Survivors with Lymphoma: A Propensity-Score Matching Analysis
Source: MDPI journal article supplement (doi:10.3390/cancers14030607), 2022-01-25
Supplement: s1 [file s1]

**Table S1.** Comparisons of HRQoL between different types of lymphomas.

|       | Global       |             |             | Physical  |             |             | Role     |             |             |
|-------|--------------|-------------|-------------|-----------|-------------|-------------|----------|-------------|-------------|
|       |              | 95% C.I.    |             |           | 95% C.I.    |             |          | 95% C.I.    |             |
|       | Mean         | Lower limit | Upper limit | Mean      | Lower limit | Upper limit | Mean     | Lower limit | Upper limit |
| HL    | 62.99        | 60.64605    | 65.3241     | 79.58     | 77.54043    | 81.62375    | 76.12    | 73.3021     | 78.9367     |
| A-NHL | 60.34        | 59.05771    | 61.62057    | 74.67     | 73.45514    | 75.88242    | 67.3     | 65.59703    | 69.00313    |
| I-NHL | 61.74        | 60.1221     | 63.34865    | 80.67     | 79.43518    | 81.91234    | 77.37    | 75.5809     | 79.16201    |
|       | Emotional    |             |             | Cognitive |             |             | Social   |             |             |
|       |              | 95% C.I.    |             |           | 95% C.I.    |             |          | 95% C.I.    |             |
|       | Mean         | Lower limit | Upper limit | Mean      | Lower limit | Upper limit | Mean     | Lower limit | Upper limit |
| HL    | 66.27        | 63.7299     | 68.80741    | 76.62     | 74.32538    | 78.90845    | 51.24    | 48.08361    | 54.40395    |
| A-NHL | 65.31        | 63.97935    | 66.64879    | 75.51     | 74.33808    | 76.67802    | 47.31    | 45.58835    | 49.02765    |
| I-NHL | 65.02        | 63.27196    | 66.75907    | 77.64     | 76.18581    | 79.08901    | 55.19    | 52.97944    | 57.3929     |
|       | Fatigue      |             |             | Nausea    |             |             | Pain     |             |             |
|       |              | 95% C.I.    |             |           | 95% C.I.    |             |          | 95% C.I.    |             |
|       | Mean         | Lower limit | Upper limit | Mean      | Lower limit | Upper limit | Mean     | Lower limit | Upper limit |
| HL    | 42.65        | 40.03514    | 45.27166    | 13.48     | 11.13112    | 15.83405    | 19.3     | 16.94626    | 21.6607     |
| A-NHL | 46.11        | 44.74905    | 47.46526    | 13.62     | 12.4472     | 14.78953    | 22.93    | 21.65713    | 24.21249    |
| I-NHL | 40.57        | 38.97478    | 42.1718     | 8.84      | 7.62962     | 10.05655    | 19.95    | 18.38262    | 21.511      |
|       | Dyspnea      |             |             | Insomnia  |             |             | Appetite |             |             |
|       |              | 95% C.I.    |             |           | 95% C.I.    |             |          | 95% C.I.    |             |
|       | Mean         | Lower limit | Upper limit | Mean      | Lower limit | Upper limit | Mean     | Lower limit | Upper limit |
| HL    | 39.7         | 36.98264    | 42.42035    | 26.77     | 23.7215     | 29.81084    | 23.58    | 20.6372     | 26.52698    |
| A-NHL | 42.91        | 41.49208    | 44.33531    | 30.75     | 29.13818    | 32.35562    | 26.47    | 24.96043    | 27.9823     |
| I-NHL | 39.05        | 37.36369    | 40.73915    | 31.16     | 29.10439    | 33.2183     | 20.79    | 19.02759    | 22.55042    |
|       | Constipation |             |             | Diarrhea  |             |             |          |             |             |
|       |              | 95% C.I.    |             |           | 95% C.I.    |             |          |             |             |
|       | Mean         | Lower limit | Upper limit | Mean      | Lower limit | Upper limit |          |             |             |
| HL    | 17.21        | 14.4403     | 19.98756    | 10.55     | 8.385861    | 12.70867    |          |             |             |
| A-NHL | 18.03        | 16.62801    | 19.42371    | 13.64     | 12.49066    | 14.79886    |          |             |             |
| I-NHL | 16.45        | 14.74594    | 18.14413    | 12.54     | 11.14116    | 13.94749    |          |             |             |

**Table S2.** Relationship between HRQoL and respondents' type adjusted by socioeconomic characteristics and health status.

|                    | Physical            |                     |                           | Role                |                     |                           |
|--------------------|---------------------|---------------------|---------------------------|---------------------|---------------------|---------------------------|
|                    | Model 1             | Model 2             | Model 3                   | Model 4             | Model 5             | Model 6                   |
|                    | Full model          | Being treated model | Treatment completed model | Full model          | Being treated model | Treatment completed model |
| Proxy              | 4.73(2.36,7.1)      | 5.54(2.02,9.07)     | 3.41(0.35,6.46)           | 2.25(-1.12,5.61)    | 3.22(-1.85,8.29)    | 0.63(-3.61,4.88)          |
| Female             | -3.72(-6.06,-1.38)  | -3.57(-7.09,-0.05)  | -3.72(-6.71,-0.74)        | -0.07(-3.4,3.25)    | -1.73(-6.79,3.33)   | 2.02(-2.13,6.16)          |
| 41-60              | -3.58(-6.36,-0.79)  | -3.33(-7.47,0.8)    | -3.73(-7.37,-0.09)        | -4.47(-8.42,-0.52)  | -4.72(-10.66,1.22)  | -3.94(-9,1.11)            |
| ≥61                | -8.59(-14.11,-3.07) | -5.61(-13.55,2.34)  | -15.11(-22.61,-7.61)      | -4.13(-11.95,3.7)   | -2.09(-13.51,9.33)  | -8.95(-19.37,1.47)        |
| Tertiary and above | -2.44(-5.17,0.29)   | -2.77(-6.82,1.28)   | -1.66(-5.19,1.88)         | -3.29(-7.16,0.58)   | -3.77(-9.6,2.06)    | -1.9(-6.82,3.01)          |
| Rural resident     | -0.41(-3.71,2.89)   | -1.92(-6.69,2.85)   | 1.91(-2.53,6.34)          | -4.18(-8.86,0.5)    | -6.46(-13.33,0.4)   | 0.14(-6.02,6.31)          |
| Married            | 0.97(-4.11,6.04)    | -1.9(-9.56,5.75)    | 4.78(-1.65,11.21)         | 3.34(-3.86,10.54)   | 2.74(-8.26,13.75)   | 4.09(-4.84,13.03)         |
| Divorce/widow(er)  | 3.54(-2.8,9.89)     | 1.82(-7.87,11.51)   | 5.92(-2.03,13.87)         | 7.98(-1.02,16.98)   | 7.37(-6.56,21.29)   | 8.71(-2.34,19.76)         |
| 50,001~100,000     | 5.72(2.46,8.97)     | 5.11(0.21,10.02)    | 6.07(1.95,10.18)          | 2.27(-2.34,6.89)    | 0.72(-6.33,7.77)    | 3.8(-1.91,9.52)           |
| ≥100,001           | 3.45(0.8,6.1)       | 4.28(0.38,8.17)     | 2.09(-1.37,5.55)          | 1.75(-2,5.5)        | 2.33(-3.27,7.92)    | 0.77(-4.04,5.57)          |
| Non-employed       | -4.19(-6.93,-1.44)  | -3.77(-7.91,0.37)   | -4.97(-8.45,-1.49)        | -6.93(-10.82,-3.03) | -7.35(-13.3,-1.39)  | -6.73(-11.56,-1.89)       |
| Retired            | 0.57(-3.49,4.63)    | 0.79(-5.49,7.06)    | 0.94(-4.08,5.96)          | 3.58(-2.18,9.34)    | 4.03(-5,13.05)      | 3.37(-3.61,10.34)         |
| URBS               | 1.46(-3.69,6.61)    | 0.66(-7.44,8.75)    | 3.25(-2.97,9.46)          | 0.98(-6.32,8.29)    | -2.22(-13.85,9.42)  | 5.4(-3.24,14.03)          |
| NRCS               | 0.85(-2.61,4.3)     | -1.35(-6.38,3.67)   | 3.96(-0.6,8.52)           | 3.38(-1.52,8.28)    | 1.85(-5.38,9.07)    | 5.9(-0.44,12.23)          |
| FMS                | 2.74(-1.04,6.52)    | 4.41(-1.16,9.97)    | -0.04(-4.98,4.9)          | 5.15(-0.21,10.52)   | 8.46(0.46,16.46)    | -0.19(-7.05,6.67)         |
| Duration           | 0.09(-0.64,0.82)    | -0.1(-1.79,1.6)     | 0.18(-0.53,0.89)          | 0.51(-0.53,1.55)    | 0.44(-2,2.88)       | 0.57(-0.42,1.55)          |
| Chemotherapy, Yes  | -2.66(-7.19,1.87)   | -1.76(-8.05,4.53)   | -2.52(-9.25,4.21)         | -6.35(-12.78,0.08)  | -7.07(-16.11,1.97)  | -3.78(-13.13,5.58)        |

|                    |                      |                    |                   |                       |                    |                  |
|--------------------|----------------------|--------------------|-------------------|-----------------------|--------------------|------------------|
| Immunotherapy, Yes | 1.32(-1.04,3.67)     | 2.12(-1.35,5.6)    | -0.63(-3.71,2.46) | 2.12(-1.21,5.46)      | 2.09(-2.9,7.09)    | 1.37(-2.92,5.65) |
| Radiotherapy, Yes  | 1.17(-1.54,3.88)     | 1.68(-2.78,6.14)   | 0.32(-2.84,3.48)  | 3.75(-0.09,7.6)       | 5.95(-0.47,12.36)  | 1.56(-2.83,5.95) |
| Surgery, Yes       | -3.68(-6.78,-0.59)   | -5.59(-10.7,-0.48) | -2.2(-5.78,1.39)  | -5.34(-9.73,-0.95)    | -6.52(-13.86,0.82) | -4.61(-9.6,0.37) |
| Being treated      | -11.42(-13.72,-9.12) |                    |                   | -21.81(-25.07,-18.54) |                    |                  |

Table S2. *Cont.*

|                    | Emotional          |                     |                           | Cognitive          |                     |                           |
|--------------------|--------------------|---------------------|---------------------------|--------------------|---------------------|---------------------------|
|                    | Model 7            | Model 8             | Model 9                   | Model 10           | Model 11            | Model 12                  |
|                    | Full model         | Being treated model | Treatment completed model | Full model         | Being treated model | Treatment completed model |
|                    |                    |                     |                           |                    |                     |                           |
| Proxy              | 1.46(-1.39,4.32)   | 3.06(-1,7.13)       | 3.06(-1,7.13)             | -3.98(-6.53,-1.42) | -3.22(-6.79,0.35)   | -5.41(-9.1,-1.73)         |
| Female             | -2.28(-5.1,0.54)   | 0.75(-3.31,4.81)    | 0.75(-3.31,4.81)          | -3.86(-6.38,-1.33) | -3.11(-6.68,0.45)   | -5.12(-8.71,-1.52)        |
| 41-60              | -2.13(-5.49,1.22)  | -4.84(-9.62,-0.07)  | -4.84(-9.62,-0.07)        | -2.65(-5.65,0.36)  | -3(-7.19,1.19)      | -2.98(-7.36,1.41)         |
| ≥61                | 3.15(-3.49,9.8)    | 3.52(-5.65,12.69)   | 3.52(-5.65,12.69)         | 0.48(-5.46,6.43)   | 3.11(-4.94,11.16)   | -3.99(-13.03,5.06)        |
| Tertiary and above | -1.11(-4.39,2.17)  | 0.84(-3.84,5.52)    | 0.84(-3.84,5.52)          | -2.42(-5.36,0.52)  | -2.08(-6.19,2.02)   | -2.77(-7.04,1.5)          |
| Rural resident     | 0.54(-3.44,4.51)   | -1.4(-6.91,4.11)    | -1.4(-6.91,4.11)          | 2.25(-1.3,5.81)    | 0.86(-3.98,5.69)    | 4.25(-1.09,9.6)           |
| Married            | -3.22(-9.33,2.89)  | -5.44(-14.27,3.4)   | -5.44(-14.27,3.4)         | 1.5(-3.97,6.97)    | 3.72(-4.04,11.47)   | -1.32(-9.07,6.43)         |
| Divorce/widow(er)  | 0(-7.64,7.63)      | -3.05(-14.22,8.13)  | -3.05(-14.22,8.13)        | 3.33(-3.51,10.16)  | 8.38(-1.43,18.19)   | -2.9(-12.49,6.69)         |
| 50,001~100,000     | 6.81(2.9,10.73)    | 4.37(-1.29,10.03)   | 4.37(-1.29,10.03)         | 5.68(2.17,9.19)    | 5.11(0.14,10.08)    | 5.95(0.99,10.91)          |
| ≥100,001           | 2.82(-0.36,6.01)   | 3.7(-0.79,8.19)     | 3.7(-0.79,8.19)           | 1.44(-1.41,4.29)   | 2.34(-1.6,6.29)     | 0.02(-4.16,4.19)          |
| Non-employed       | -4.32(-7.62,-1.01) | -4.89(-9.67,-0.11)  | -4.89(-9.67,-0.11)        | -4.88(-7.84,-1.93) | -4.98(-9.18,-0.79)  | -4.94(-9.14,-0.75)        |
| Retired            | 0.68(-4.21,5.57)   | -1.65(-8.89,5.6)    | -1.65(-8.89,5.6)          | -2.97(-7.34,1.41)  | -4.35(-10.71,2.01)  | -1.59(-7.64,4.46)         |
| URBS               | 3.27(-2.93,9.47)   | 4.69(-4.65,14.03)   | 4.69(-4.65,14.03)         | 1.84(-3.7,7.39)    | 3.05(-5.15,11.25)   | 1.64(-5.86,9.13)          |
| NRCS               | 1.06(-3.09,5.22)   | 0.95(-4.85,6.76)    | 0.95(-4.85,6.76)          | -0.73(-4.45,2.99)  | -2.69(-7.78,2.4)    | 2.43(-3.07,7.92)          |
| FMS                | 2(-2.55,6.55)      | 3.91(-2.51,10.33)   | 3.91(-2.51,10.33)         | -0.54(-4.62,3.53)  | 3.17(-2.47,8.81)    | -6.33(-12.29,-0.38)       |
| Duration           | 0.02(-0.86,0.9)    | 0.49(-1.47,2.45)    | 0.49(-1.47,2.45)          | -0.06(-0.85,0.72)  | -0.29(-2,1.43)      | -0.02(-0.87,0.83)         |
| Chemotherapy, Yes  | -4.18(-9.63,1.28)  | -6.56(-13.82,0.7)   | -6.56(-13.82,0.7)         | -4.17(-9.05,0.72)  | -6.29(-12.66,0.09)  | 0.31(-7.81,8.43)          |

|                    |                      |                   |                   |                   |                   |                   |
|--------------------|----------------------|-------------------|-------------------|-------------------|-------------------|-------------------|
| Immunotherapy, Yes | 0.13(-2.7,2.96)      | -2.21(-6.22,1.8)  | -2.21(-6.22,1.8)  | 0.45(-2.08,2.99)  | -0.3(-3.82,3.22)  | 0.9(-2.81,4.62)   |
| Radiotherapy, Yes  | 0.12(-3.14,3.38)     | -0.27(-5.42,4.88) | -0.27(-5.42,4.88) | -1.37(-4.28,1.55) | -1.66(-6.18,2.86) | -1.04(-4.85,2.76) |
| Surgery, Yes       | -3.39(-7.12,0.33)    | -3.87(-9.77,2.02) | -3.87(-9.77,2.02) | -1.81(-5.15,1.52) | -2.6(-7.78,2.57)  | -1.51(-5.83,2.82) |
| Being treated      | -12.62(-15.39,-9.85) |                   |                   | -6.98(-9.46,-4.5) |                   |                   |

Table S2. *Cont.*

|                    | <b>Social</b>         |                            |                                  |
|--------------------|-----------------------|----------------------------|----------------------------------|
|                    | <b>Model 13</b>       | <b>Model 14</b>            | <b>Model 15</b>                  |
|                    | <b>Full model</b>     | <b>Being treated model</b> | <b>Treatment completed model</b> |
|                    |                       |                            |                                  |
| Proxy              | -5.09(-8.62,-1.55)    | -1.58(-6.37,3.22)          | -9.43(-14.74,-4.13)              |
| Female             | 0.06(-3.43,3.55)      | 0.96(-3.83,5.75)           | -0.7(-5.88,4.48)                 |
| 41-60              | -6.17(-10.32,-2.02)   | -5.21(-10.84,0.42)         | -7.71(-14.02,-1.39)              |
| ≥61                | 1.77(-6.45,9.99)      | 3.57(-7.25,14.39)          | -1.76(-14.78,11.25)              |
| Tertiary and above | -3.61(-7.67,0.45)     | -3.69(-9.2,1.83)           | -3.29(-9.43,2.85)                |
| Rural resident     | -1.65(-6.57,3.26)     | -3.57(-10.07,2.93)         | 1.36(-6.34,9.06)                 |
| Married            | 2.21(-5.36,9.77)      | 0.12(-10.31,10.54)         | 5.47(-5.69,16.63)                |
| Divorce/widow(er)  | 1.08(-8.37,10.54)     | -0.38(-13.57,12.81)        | 2.36(-11.44,16.16)               |
| 50,001~100,000     | 11.52(6.66,16.37)     | 9.28(2.6,15.96)            | 13.5(6.36,20.64)                 |
| ≥100,001           | 8.22(4.27,12.16)      | 7.32(2.02,12.62)           | 8.6(2.6,14.61)                   |
| Non-employed       | -5.98(-10.07,-1.89)   | -4.1(-9.74,1.54)           | -8.49(-14.53,-2.45)              |
| Retired            | 1.18(-4.87,7.23)      | 0.13(-8.42,8.67)           | 2.11(-6.6,10.82)                 |
| URBS               | 4.36(-3.31,12.03)     | 2.86(-8.16,13.89)          | 7(-3.79,17.78)                   |
| NRCS               | 0.78(-4.36,5.93)      | -1.86(-8.7,4.98)           | 4.58(-3.33,12.5)                 |
| FMS                | -0.81(-6.45,4.82)     | -0.62(-8.19,6.96)          | -2.84(-11.41,5.73)               |
| Duration           | 0.39(-0.7,1.48)       | 1.52(-0.79,3.83)           | 0.04(-1.19,1.27)                 |
| Chemotherapy, Yes  | -6.52(-13.27,0.24)    | -11.85(-20.41,-3.28)       | 7.16(-4.52,18.85)                |
| Immunotherapy, Yes | 0.37(-3.13,3.88)      | -0.19(-4.92,4.54)          | 0.23(-5.12,5.58)                 |
| Radiotherapy, Yes  | 3.11(-0.92,7.15)      | 2.66(-3.42,8.73)           | 3.67(-1.81,9.15)                 |
| Surgery, Yes       | -5.4(-10.02,-0.79)    | -6.71(-13.66,0.25)         | -3.26(-9.48,2.97)                |
| Being treated      | -16.82(-20.25,-13.39) |                            |                                  |
